# Supplementary material for: Mechanics of intermediate filament networks assembled from keratins K8 and K18
Source: Royal Society of Chemistry journal article supplement (doi:10.1039/c3sm51999f), 2013-01-01
Supplement: c3sm51999f.pdf [file c3sm51999f.pdf]

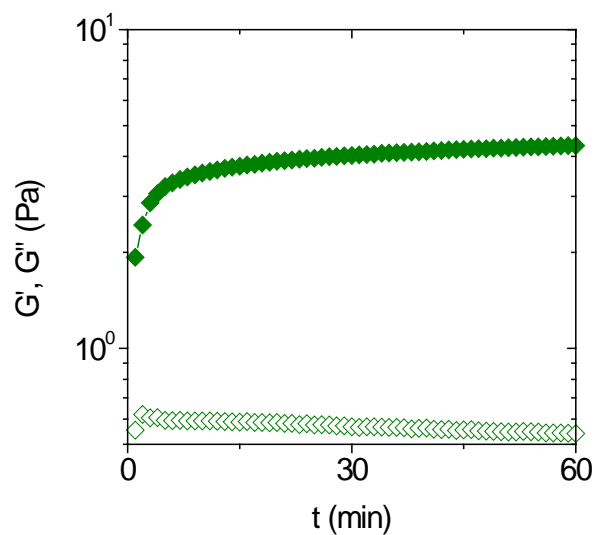

**Fig. S1** Evolution of  $G'$  (closed symbols) and  $G''$  (open symbols) during the assembly of 0.5 g/l K8/K18 at a frequency of 1 rad/s.
